# Supplementary material for: Kinetic analysis of Cas12a and Cas13a RNA-Guided nucleases for development of improved CRISPR-Based diagnostics
Source: PubMed Central journal article supplement — iScience. 2021 Aug 18;24(9):102996. doi: 10.1016/j.isci.2021.102996 (PMC8411246; doi:10.1016/j.isci.2021.102996), 2021-08-18
Supplement: mmc1.pdf [file mmc1.pdf]

**iScience, Volume 24**

**Supplemental information**

**Kinetic analysis of Cas12a and Cas13a**

**RNA-Guided nucleases for development**

**of improved CRISPR-Based diagnostics**

**Eric A. Nalefski, Nidhi Patel, Philip J.Y. Leung, Zeba Islam, Remy M. Kooistra, Ishira Parikh, Estelle Marion, Gavin J. Knott, Jennifer A. Doudna, Anne-Laure M. Le Ny, and Damian Madan**

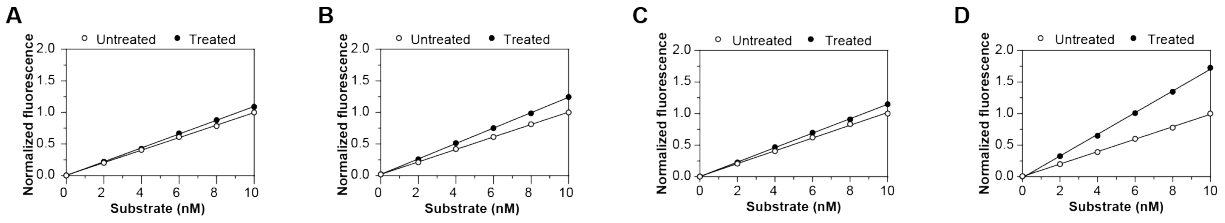

**Figure S1. Effect of Nuclease Digestion on Fluorescence of Reporter Probes (Related to Figures 2 – 6)**

RNA and DNA target and *trans*-substrates used in substrate-capture assay were digested with nucleases. Fluorescence of digested products was recorded and normalized to that of untreated material (symbols). Lines show linear fit yielding slopes listed in Supplement Table 2. RNase A-treatment of *trans*-substrate U<sub>10</sub> (A) or Fluorescent Target RNA-1 (B). DNase I-treatment of *trans*-substrate C<sub>10</sub> (C) or Fluorescent Target DNA-1 (D).

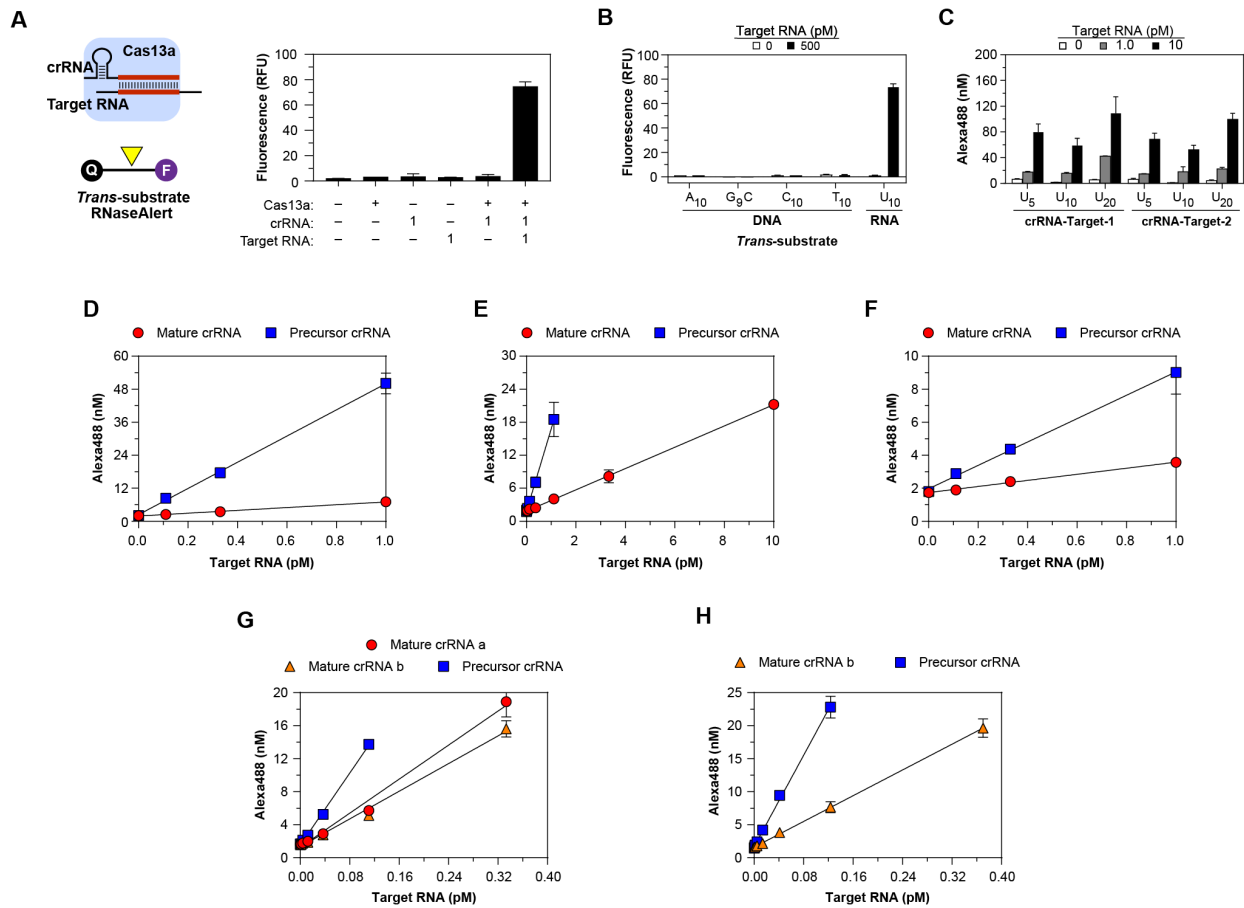

**Figure S2. Cleavage of *Trans*-Substrates by Cas13a (Related to Figures 2 and 3)**

(A) *Trans*-cleavage assay used to test components on RNaseAlert. Cas13a-crRNA was pre-reacted with target, then reacted with RNaseAlert. Cleavage of this substrate un-tethers fluorescein (F) from a quencher molecule (Q), resulting in increased fluorescence.

(B) Specificity for RNA *trans*-substrates tested with Cas13a, crRNA-3, Target RNA-3, and different Alexa488-labeled DNA or RNA *trans*-substrates.

(C) *Trans*-substrate length-preference tested with two different Cas13a-crRNA reacted with varied targets and poly-U *trans*-substrates of differing lengths.

(D – H) Cas13a bound to mature or precursor crRNA was reacted with varied target RNA and *trans*-substrate U<sub>10</sub>. Lines show linear fit to yield  $k_{app}$  (Table S3) for: (D) mature or precursor crRNA-1, Target RNA-1-a, WT Cas13a; (E) mature or precursor crRNA-2, Target RNA-2, WT Cas13a; (F) mature or precursor crRNA-2, Target RNA-2-a, WT Cas13a; (G) mature crRNA-3-a or -b or precursor crRNA-3, Target RNA-3, WT Cas13a; (H) mature crRNA-3 b or precursor crRNA-3, Target RNA-3, K1082A Cas13a. In all panels data represent mean  $\pm$  SD.

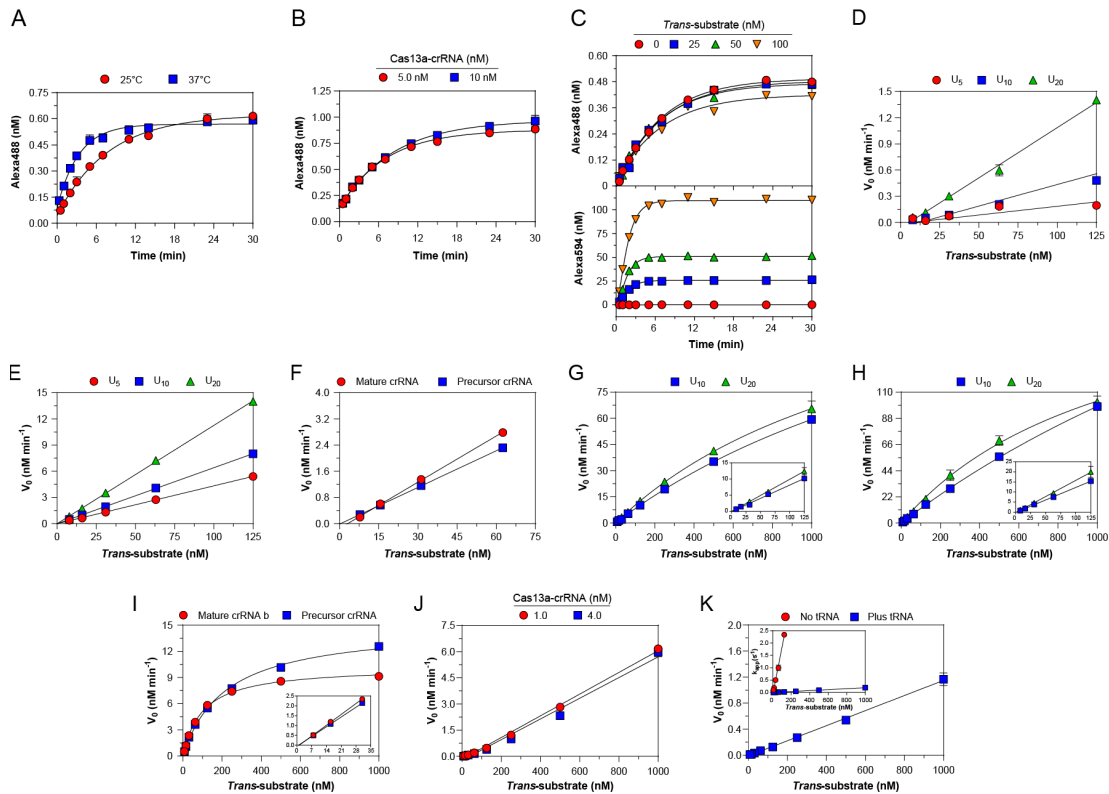

**Figure S3. Kinetics of Target and *Trans*-Substrate Cleavage by Cas13a (Related to Figures 2 and 3)**

(A) Single-turnover reactions carried out using 2.5 nM Cas13a-crRNA-1 reacted with 1.0 nM Fluorescent Target RNA-1 at varied temperature. Lines show single-exponential fit of control-adjusted signals (symbols) to yield  $k_{\text{obs}} (\pm \text{SE})$  of  $0.0021 (\pm 0.0001) \text{ s}^{-1}$  (25°C) and  $0.0051 (\pm 0.0005) \text{ s}^{-1}$  (37°C). (B) Single-turnover reactions carried out using varied Cas13a-crRNA-1 reacted with 1.0 nM Fluorescent Target RNA-1 at 25°C and quenched with a denaturing solution containing guanidinium chloride and EDTA. Lines show single-exponential fit of control-adjusted signals (symbols) to yield  $k_{\text{obs}} (\pm \text{SE})$  of  $0.0024 (\pm 0.0002) \text{ s}^{-1}$  and  $0.0021 (\pm 0.0001) \text{ s}^{-1}$  for 5.0 and 10 nM ribonucleoprotein, respectively. (C) Simultaneously-recorded single-turnover cleavage of target (*top*) and multiple-turnover cleavage of *trans*-substrate (*bottom*), carried out using 5.0 nM Cas13a-crRNA reacted with a mixture containing 1.0 nM of Fluorescent Target RNA-1a, a modified form of Fluorescent Target RNA-1 with additional U<sub>10</sub> residues at its 5' end, and varied Alexa594-labeled *trans*-substrate U<sub>10</sub>. Lines show single-exponential fit (where applicable) of control-adjusted signals (symbols) to yield  $k_{\text{obs}}$  ranging between  $0.0024 - 0.0025 \text{ s}^{-1}$  (target cleavage) and  $0.010 - 0.011 \text{ s}^{-1}$  (*trans*-cleavage). (D – F) Estimation of kinetic constants from data collected at low substrate (from Figures 3E, 3F, and 3I). Symbols ( $\pm \text{SE}$ ) show  $V_0$ ; lines show linear fit to yield estimates (Table 1 and Table S4). Cas13a was activated by: mature (D) and precursor (E) forms of crRNA-1 with Target RNA-1, then reacted with varied poly-U *trans*-substrates; (F) mature and precursor forms of crRNA-1 and Target RNA-1, then reacted with RNaseAlert. (G – I) Steady-state kinetics for *trans*-cleavage by Cas13 activated by a different crRNA-target combination. Cas13a-crRNA was pre-reacted with Target RNA-3, then reacted with varied *trans*-substrate. Symbols show  $V_0 (\pm \text{SE})$ ; lines show Michaelis-Menten fit to yield kinetic constants (Table 1). Cas13a was bound to: mature b (G) and precursor (H) forms of crRNA-Target-3 reacted with poly-U *trans*-substrates; (I) mature b and precursor forms of crRNA-Target-3 reacted with RNaseAlert. (*insets*) Linear fit at low substrate concentrations to yield estimates of kinetic constants (Table S4). (J) Steady-state kinetics for *trans*-cleavage using varied Cas13a-crRNA concentrations. Either 1.0 or 4.0 nM Cas13a-crRNA-1 was pre-reacted with Target RNA-1, then reacted with varied *trans*-substrate U<sub>10</sub>. Results obtained with 1.0 nM Cas13a-crRNA are taken from Figure 3E and used in Table 1. Symbols show  $V_0 (\pm \text{SE})$ ; lines show linear fit to yield a slope of  $0.0059 (\pm 0.0003) \text{ min}^{-1}$  allowing estimation for  $k_{\text{cat}}/K_M$  of  $9.9 (\pm 0.5) \times 10^6 \text{ M}^{-1} \text{ s}^{-1}$  (4.0 nM Cas13a-crRNA). (K) Effect of tRNA on Cas13a *trans*-nuclease. Cas13a-crRNA-1 was pre-reacted with Target RNA-1, then reacted with varied *trans*-substrate U<sub>20</sub> in the presence of 100  $\mu\text{g}/\text{mL}$  yeast tRNA. Symbols show  $V_0 (\pm \text{SE})$ ; line shows linear fit to yield slope of  $0.00116 (\pm 0.00002) \text{ min}^{-1}$  and an estimate for  $k_{\text{cat}}/K_M$  of  $1.94 (\pm 0.03) \times 10^5 \text{ M}^{-1} \text{ s}^{-1}$ ,  $\sim 100$ -fold lower than that obtained in the absence of tRNA. (*inset*) Comparison of  $k_{\text{app}}$ . In panels (A, B, and D – K) data represent mean  $\pm \text{SD}$ .

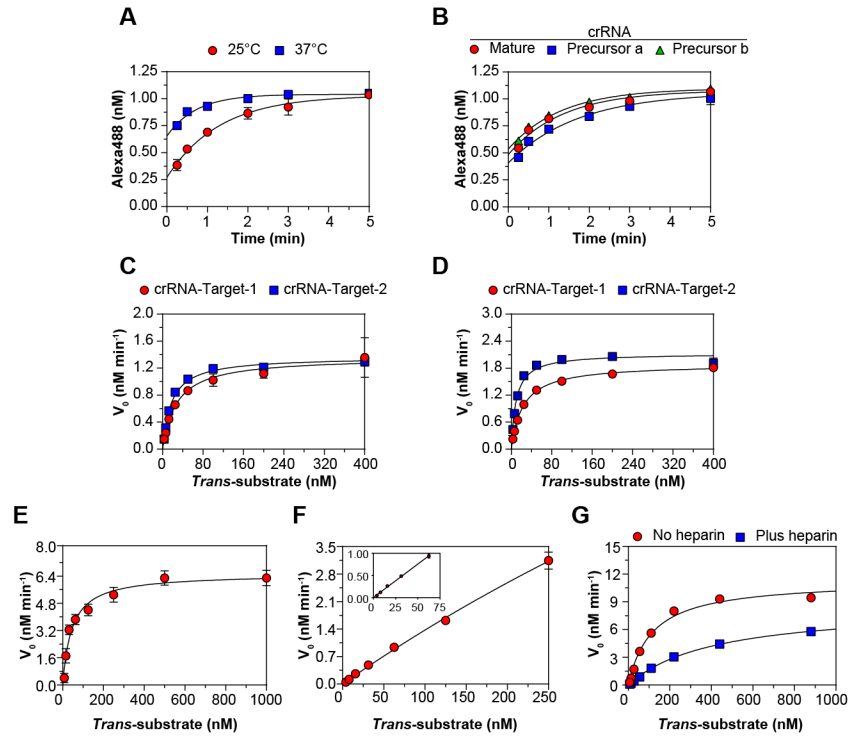

**Figure S4. Kinetics of Target and *Trans*-Substrate Cleavage by Cas12a (Related to Figures 4 and 5)**

(A) Single-turnover reactions carried out at different temperatures using 5.0 nM Cas12a-crRNA-1 reacted with 1.0 nM Fluorescent Target DNA-1. Lines show single-exponential fit of control-adjusted signals (symbols) to yield  $k_{obs}$  ( $\pm$  SE) of  $0.013$  ( $\pm 0.002$ )  $s^{-1}$  (25°C) and  $0.023$  ( $\pm 0.007$ )  $s^{-1}$  (37°C).

(B) Single-turnover reactions using 5.0 nM Cas12a bound to mature and precursor crRNA reacted with 1.0 nM Fluorescent Target DNA-1. Lines show single-exponential fit of control-adjusted signals (symbols) to yield  $k_{obs}$  ( $\pm$  SE):  $0.012$  ( $\pm 0.004$ )  $s^{-1}$  (mature crRNA);  $0.010$  ( $\pm 0.002$ )  $s^{-1}$  (precursor crRNA a);  $0.013$  ( $\pm 0.002$ )  $s^{-1}$  (precursor crRNA b).

(C and D) Steady-state kinetics of *trans*-cleavage activated by two different crRNA-target pairs, using 1.0 nM (C) or 4.0 nM (D) Cas12a-crRNA reacted with varied  $C_{20}$  concentrations. Symbols show  $V_0$  ( $\pm$  SE) calculated from time courses; lines show Michaelis-Menten fit to yield kinetic constants. Results for reactions shown in (C) are listed in Table 1. Results for reactions shown in (D):  $k_{cat} = 3.15$  ( $\pm 0.07$ )  $s^{-1}$ ,  $K_M = 23.4$  ( $\pm 0.8$ ) nM, and  $k_{cat}/K_M = 1.35$  ( $\pm 0.05$ )  $\times 10^8$   $M^{-1} s^{-1}$  (crRNA-Target-1);  $k_{cat} = 3.55$  ( $\pm 0.07$ )  $s^{-1}$ ,  $K_M = 9.6$  ( $\pm 1.3$ ) nM, and  $k_{cat}/K_M = 3.70$  ( $\pm 0.13$ )  $\times 10^8$   $M^{-1} s^{-1}$  (crRNA-Target-2).

(E) Application of quenching method in measuring steady-state cleavage of DNaseAlert by Cas12a. Cleavage of DNaseAlert by Cas12a activated by crRNA-Target-1 as in Figure 5E except that after 1 min intervals for 5 min, reactions were quenched with the salt-EDTA quench solution, and fluorescence values were recorded. Symbols show  $V_0$  ( $\pm$  SE) calculated from time courses; line shows Michaelis-Menten fit to yield  $K_M = 45$  ( $\pm 8$ ) nM,  $V_{max} = 6.5$  ( $\pm 0.3$ )  $nM min^{-1}$ ,  $k_{cat}$  of  $1.05$  ( $\pm 0.05$ )  $s^{-1}$  and  $k_{cat}/K_M$  of  $2.4$  ( $\pm 0.5$ )  $\times 10^7$   $M^{-1} s^{-1}$ .

(F) Steady-state kinetics for *trans*-cleavage of C<sub>10</sub> by Cas12a activated by crRNA-Target-3 carried out in the presence of 50  $\mu g/mL$  heparin. Symbols show  $V_0$  ( $\pm$  SE) calculated from time courses; line shows Michaelis-Menten fit to yield  $K_M$  of  $1400$  ( $\pm 500$ ) nM,  $V_{max}$  of  $21$  ( $\pm 6$ )  $nM min^{-1}$ ,  $k_{cat}$  of  $3.5$  ( $\pm 1.0$ )  $s^{-1}$  and  $k_{cat}/K_M = 2.5$  ( $\pm 1.1$ )  $\times 10^6$   $M^{-1} s^{-1}$ . (Inset) Linear fit of  $V_0$  at low substrate concentrations to yield an estimate for  $k_{cat}/K_M$  of  $2.50$  ( $\pm 0.06$ )  $\times 10^6$   $M^{-1} s^{-1}$ . Assay was performed in an alternative buffer composed of 5% glycerol, 20 mM Tris (pH 7.5), 100 mM KCl, 5 mM MgCl<sub>2</sub>, 1 mM DTT, 100  $\mu g/mL$  BSA.

(G) Steady-state kinetics for cleavage of DNaseAlert by Cas12a activated by crRNA-Target-6 was carried out in the absence or presence of 100  $\mu g/mL$  heparin. Symbols show  $V_0$  ( $\pm$  SE) calculated from time courses; lines show Michaelis-Menten fit to yield:  $K_M$  of  $120$  ( $\pm 20$ ) nM,  $V_{max}$  of  $11.3$  ( $\pm 0.6$ )  $nM min^{-1}$ ,  $k_{cat}$  of  $1.89$  ( $\pm 0.10$ )  $s^{-1}$ , and  $k_{cat}/K_M$  of  $1.6$  ( $\pm 0.3$ )  $\times 10^7$   $M^{-1} s^{-1}$  (no heparin);  $K_M$  of  $420$  ( $\pm 30$ ) nM,  $V_{max}$  of  $8.6$  ( $\pm 0.3$ )  $nM min^{-1}$ ,  $k_{cat}$  of  $1.43$  ( $\pm 0.05$ )  $s^{-1}$ , and  $k_{cat}/K_M$  of  $3.5$  ( $\pm 0.3$ )  $\times 10^6$   $M^{-1} s^{-1}$  (heparin). Assay was performed in an alternative buffer composed of 5% glycerol, 20 mM Tris (pH 7.5), 100 mM KCl, 5 mM MgCl<sub>2</sub>, 1 mM DTT, 100  $\mu g/mL$  BSA. In panels (A, B, and C – G) data represent mean  $\pm$  SD.

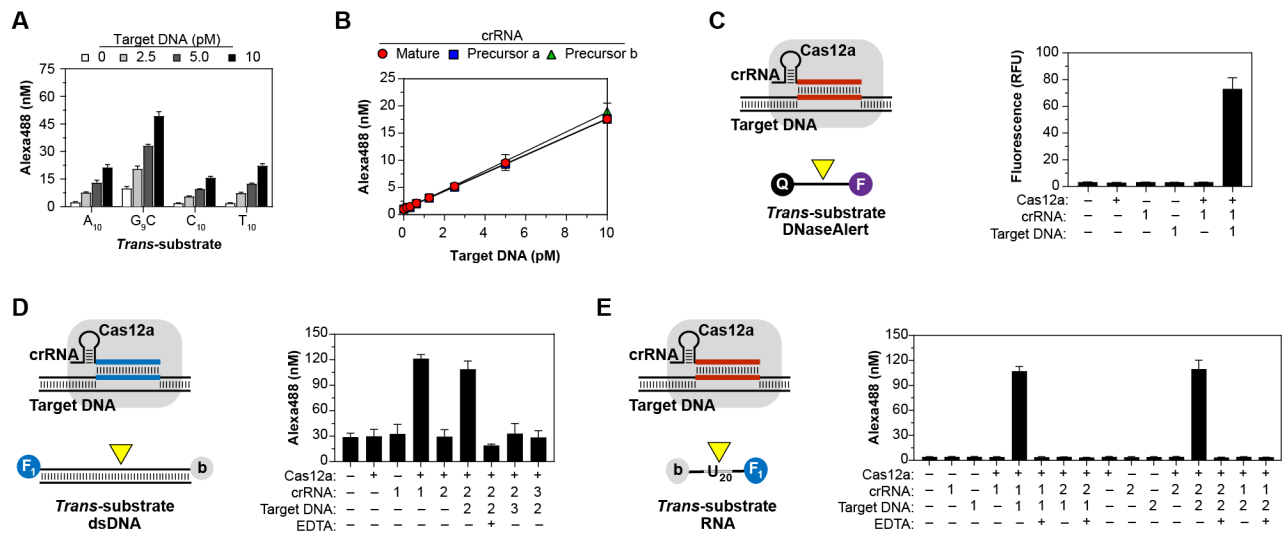

**Figure S5. Cleavage of *Trans*-Substrates by Cas12a (Related to Figures 4 and 5)**

(A) Nucleobase-preference for AsCas12a-crRNA-1 reacted with varied Target DNA-1 concentrations and *trans*-ssDNA substrate of differing sequence.

(B) Cas12a bound to mature or two precursor forms of crRNA-1 was reacted with varied Target DNA-1 and *trans*-substrate C<sub>10</sub>. Lines show linear fitting to yield  $k_{app}$  ( $\pm$  SE): 0.922 ( $\pm$  0.006) s<sup>-1</sup> (mature crRNA-1); 0.922 ( $\pm$  0.006) s<sup>-1</sup> (precursor crRNA-1a); 0.994 ( $\pm$  0.011) s<sup>-1</sup> (precursor crRNA-1b).

(C) *Trans*-DNase assay using components tested on DNaseAlert. Cleavage increases fluorescence by untethering HEX (F) from a quencher (Q).

(D) *Trans*-dsDNA cleavage assay using fluorescent dsDNA *trans*-substrate labeled with biotin and Alexa488 at 3' and 5' ends, respectively, on one of its strands. Components tested under multi-turnover conditions on Fluorescent Target DNA-1 containing protospacer for crRNA-1 but not for crRNA-2 and -3.

(E) *Trans*-RNA cleavage assay using components tested on RNA substrate U<sub>20</sub> labeled with biotin and Alexa488.

In all panels data represent mean  $\pm$  SD.

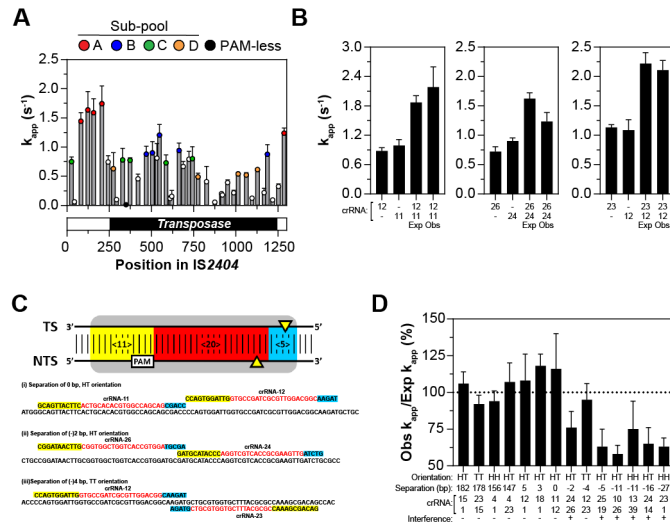

**Figure S6. Selection of Cas12a crRNA Specific for *M. ulcerans* IS2404 (Related to Figure 6)**

(A) *Trans*-DNase activity of Cas12a bound to individual crRNA, then reacted with IS2404 and *trans*-substrate C<sub>10</sub> (taken from Figure 6E). Colors indicate activities of 20 individual crRNA selected for sub-pooling; open symbols show those omitted because of low activity or interference with other crRNA (see panel D). The black symbol shows activity of enzyme guided by crRNA-4 to a protospacer lacking an adjacent PAM. Positions of protospacers are numbered according to its most 5' base. The transposase open reading frame within IS2404 is indicated by a black bar below the main plot.

(B) *Trans*-DNase activity of Cas12a bound with individual or combined (Obs) crRNA, then reacted with IS2404 and *trans*-substrate C<sub>10</sub>. The expected activity (Exp) is based on the sum of activities for the individual crRNA reactions.

(C) (Top) 35-bp footprint of crRNA-Cas12a in vicinity of the protospacer region based on exonuclease mapping of *F. novicida* Cas12a (Swarts et al., 2017). Protected sequences include 20-bp (red) of the protospacer, 11-bp (yellow) of the PAM-proximal region (the Head-end), and 8-bp (cyan) of the PAM-distal region (the Tail-end), and include the Cas12a target endonuclease sites (yellow triangles). (Bottom) Examples of closely targeted protospacer regions included in this analysis. Separation between sites is defined as the number of base pairs intervening footprints; negative values indicate the number of base pairs in footprint overlaps (underlined). Only the TS sequence is shown.

(D) *Trans*-DNase activity of Cas12a bound to combined crRNA reacted with IS2404 and *trans*-substrate C<sub>10</sub> performed as in (B). Relative orientation and separation of Cas12a-crRNA complexes are defined in (C). Interference between crRNA pairs, in which greater than 25% reduction in the expected activity is observed, is indicated by “+.”

In all panels data represent mean  $\pm$  SD.

**Table S2. Effect of Nuclease Treatment on Fluorescence of Alexa488-Labeled Substrates (Related to Figures 2 – 6)**

| Substrate <sup>a</sup>                | Calibration slope<br>(RFU/nM) <sup>b</sup> |              | Effect of nuclease<br>treatment on fluorescence <sup>c</sup> |
|---------------------------------------|--------------------------------------------|--------------|--------------------------------------------------------------|
|                                       | Untreated                                  | Treated      |                                                              |
| U <sub>5</sub>                        | 7700 (± 80)                                | 8230 (± 70)  | 1.07 (± 0.01)                                                |
| U <sub>10</sub> <sup>d</sup>          | 6230 (± 70)                                | 6880 (± 70)  | 1.10 (± 0.02)                                                |
| U <sub>20</sub>                       | 7550 (± 140)                               | 8160 (± 160) | 1.08 (± 0.03)                                                |
| Fluorescent Target RNA-1 <sup>d</sup> | 6770 (± 50)                                | 8370 (± 60)  | 1.24 (± 0.01)                                                |
| TTATT                                 | 7330 (± 150)                               | 7600 (± 200) | 1.04 (± 0.03)                                                |
| (TTATT) <sub>2</sub>                  | 5000 (± 50)                                | 5730 (± 60)  | 1.15 (± 0.02)                                                |
| (TTATT) <sub>4</sub>                  | 5610 (± 80)                                | 6410 (± 70)  | 1.14 (± 0.02)                                                |
| A <sub>10</sub>                       | 3220 (± 30)                                | 2870 (± 60)  | 0.89 (± 0.02)                                                |
| T <sub>10</sub>                       | 5500 (± 60)                                | 5910 (± 40)  | 1.07 (± 0.01)                                                |
| C <sub>10</sub> <sup>d</sup>          | 6760 (± 110)                               | 7640 (± 60)  | 1.13 (± 0.02)                                                |
| G <sub>9</sub> C                      | 1070 (± 10)                                | 7840 (± 170) | 7.31 (± 0.18)                                                |
| Fluorescent Target DNA-1 <sup>d</sup> | 2246 (± 29)                                | 3910 (± 60)  | 1.74 (± 0.03)                                                |

<sup>a</sup> See Table S1.

<sup>b</sup> Slope (± SE) of calibration line, as described in Figure S1.

<sup>c</sup> Ratio (± SE) of calibration slopes for treated to untreated.

<sup>d</sup> Representative plot of normalized fluorescence shown in Figure S1.



**Table S3. Estimation of Kinetic Constants for Cas13a *Trans*-Cleavage from Endpoint Data (Related to Figure 3 and Table 1)**

| Enzyme           | crRNA (form)     | Target RNA | Figure            | $k_{app}$ ( $s^{-1}$ ) <sup>a</sup>          | Estimated $k_{cat}/K_M$ ( $M^{-1} s^{-1}$ ) <sup>b</sup>       | Measured $k_{cat}/K_M$ ( $M^{-1} s^{-1}$ ) <sup>c</sup> |
|------------------|------------------|------------|-------------------|----------------------------------------------|----------------------------------------------------------------|---------------------------------------------------------|
| Cas13a<br>WT     | 1<br>(mature)    | 1<br>1a    | 3B<br>S2D         | 1.69 ( $\pm$ 0.01)<br>1.42 ( $\pm$ 0.04)     | $1.69 (\pm 0.01) \times 10^7$<br>$1.42 (\pm 0.04) \times 10^7$ | $1.03 (\pm 0.03) \times 10^7$<br>NT <sup>d</sup>        |
|                  | 1<br>(precursor) | 1<br>1a    | 3B<br>S2D         | 15.8 ( $\pm$ 0.1)<br>13.2 ( $\pm$ 0.7)       | $1.58 (\pm 0.01) \times 10^8$<br>$1.33 (\pm 0.07) \times 10^8$ | $1.1 (\pm 0.2) \times 10^8$<br>NT                       |
|                  | 2<br>(mature)    | 2<br>2a    | S2E<br>S2F        | 0.538 ( $\pm$ 0.003)<br>0.512 ( $\pm$ 0.019) | $5.38 (\pm 0.03) \times 10^6$<br>$5.12 (\pm 0.19) \times 10^6$ | NT<br>NT                                                |
|                  | 2<br>(precursor) | 2<br>2a    | S2E<br>S2F        | 4.16 ( $\pm$ 0.04)<br>1.97 ( $\pm$ 0.06)     | $4.16 (\pm 0.04) \times 10^7$<br>$1.97 (\pm 0.06) \times 10^7$ | NT<br>NT                                                |
|                  | 3a<br>(mature)   | 3          | S2G               | 14.3 ( $\pm$ 0.6)                            | $1.43 (\pm 0.06) \times 10^8$                                  | NT                                                      |
|                  | 3b<br>(mature)   | 3          | S2G               | 11.6 ( $\pm$ 0.4)                            | $1.16 (\pm 0.04) \times 10^8$                                  | $1.43 (\pm 0.08) \times 10^8$                           |
|                  | 3<br>(precursor) | 3          | S2G               | 30.3 ( $\pm$ 0.6)                            | $3.03 (\pm 0.06) \times 10^8$                                  | $2.1 (\pm 0.2) \times 10^8$                             |
|                  | 1<br>(mature)    | 1          | 3C                | 1.214 ( $\pm$ 0.008)                         | $1.21 (\pm 0.01) \times 10^7$                                  | NT                                                      |
|                  | 1<br>(precursor) | 1          | 3C                | 22.5 ( $\pm$ 0.3)                            | $2.25 (\pm 0.03) \times 10^8$                                  | NT                                                      |
|                  | 3b<br>(mature)   | 3          | S2H               | 13.54 ( $\pm$ 0.08)                          | $1.35 (\pm 0.01) \times 10^8$                                  | NT                                                      |
| 3<br>(precursor) | 3                | S2H        | 48.0 ( $\pm$ 0.8) | $4.80 (\pm 0.08) \times 10^8$                | NT                                                             |                                                         |

<sup>a</sup> Taken from slope ( $\pm$ SE) of dependence of product released from 100 nM  $U_{10}$  as a function of target RNA, accounting for assay duration, from figures indicated.

<sup>b</sup> Assuming  $K_M$  for *trans*-substrate  $\gg$  100 nM.

<sup>c</sup> Ratio  $k_{cat}/K_M$  based on steady-state analysis (Table 1).

<sup>d</sup> NT = not tested.

**Table S4. Estimation of Kinetic Constants for Cas13a *Trans*-Nuclease Activity at Low Substrate Concentrations (Related to Figure 3 and Table 1)**

| crRNA (form)  | Target RNA | Figure  | <i>Trans</i> -substrate | Slope (min <sup>-1</sup> ) <sup>a</sup> | Estimated $k_{cat}/K_M$ (M <sup>-1</sup> s <sup>-1</sup> ) <sup>b</sup> | Measured $k_{cat}/K_M$ (M <sup>-1</sup> s <sup>-1</sup> ) <sup>d</sup> |
|---------------|------------|---------|-------------------------|-----------------------------------------|-------------------------------------------------------------------------|------------------------------------------------------------------------|
| 1 (mature)    | 1          | 3E, S3D | U <sub>5</sub>          | 0.00200 (± 0.00009)                     | 3.3 (± 0.2) × 10 <sup>6</sup> <sup>c</sup>                              | ND                                                                     |
|               |            |         | U <sub>10</sub>         | 0.00622 (± 0.00015)                     | 1.03 (± 0.03) × 10 <sup>7</sup> <sup>c</sup>                            | ND                                                                     |
|               |            | S3D     | U <sub>20</sub>         | 0.0115 (± 0.0005)                       | 1.92 (± 0.08) × 10 <sup>7</sup>                                         | 2.2 (± 0.2) × 10 <sup>7</sup>                                          |
|               |            | S3F     | RNaseAlert              | 0.0471 (± 0.0007)                       | 7.85 (± 0.12) × 10 <sup>7</sup>                                         | 9.2 (± 0.5) × 10 <sup>7</sup>                                          |
| 1 (precursor) | 1          | S3E     | U <sub>5</sub>          | 0.0436 (± 0.0002)                       | 7.27 (± 0.03) × 10 <sup>7</sup>                                         | 7.9 (± 0.5) × 10 <sup>7</sup>                                          |
|               |            |         | U <sub>10</sub>         | 0.0640 (± 0.0036)                       | 1.07 (± 0.06) × 10 <sup>8</sup>                                         | 1.1 (± 0.2) × 10 <sup>8</sup>                                          |
|               |            | S3F     | U <sub>20</sub>         | 0.113 (± 0.001)                         | 1.88 (± 0.17) × 10 <sup>8</sup>                                         | 2.1 (± 0.1) × 10 <sup>8</sup>                                          |
|               |            |         | RNaseAlert              | 0.0374 (± 0.0002)                       | 6.24 (± 0.03) × 10 <sup>7</sup>                                         | 7.8 (± 0.5) × 10 <sup>7</sup>                                          |
| 3 (mature)    | 3          | S3G     | U <sub>10</sub>         | 0.082 (± 0.003)                         | 1.36 (± 0.05) × 10 <sup>8</sup>                                         | 1.43 (± 0.08) × 10 <sup>8</sup>                                        |
|               |            |         | U <sub>20</sub>         | 0.0994 (± 0.0010)                       | 1.66 (± 0.02) × 10 <sup>8</sup>                                         | 1.82 (± 0.07) × 10 <sup>8</sup>                                        |
|               |            | S3I     | RNaseAlert              | 0.0786 (± 0.0016)                       | 1.31 (± 0.03) × 10 <sup>8</sup>                                         | 1.7 (± 0.1) × 10 <sup>8</sup>                                          |
| 3 (precursor) | 3          | S5H     | U <sub>10</sub>         | 0.1247 (± 0.0014)                       | 2.08 (± 0.02) × 10 <sup>8</sup>                                         | 2.1 (± 0.2) × 10 <sup>8</sup>                                          |
|               |            |         | U <sub>20</sub>         | 0.1612 (± 0.0032)                       | 2.68 (± 0.05) × 10 <sup>8</sup>                                         | 3.2 (± 0.4) × 10 <sup>8</sup>                                          |
|               |            | S3I     | RNaseAlert              | 0.07078 (± 0.00018)                     | 1.118 (± 0.003) × 10 <sup>8</sup>                                       | 1.1 (± 0.1) × 10 <sup>8</sup>                                          |

<sup>a</sup> Slope for linear range of dependence of product released as a function of substrate concentration in the presence of 10 pM target RNA, taken from figures indicated.

<sup>b</sup> Assuming  $K_M$  for *trans*-substrate  $\gg$  highest point used to determine slope.

<sup>c</sup> Estimate used for Table 1.

<sup>d</sup> Calculated from  $k_{cat}$  and  $K_M$  based on steady-state Michaelis-Menten analysis (Table 1).

**Table S5. Limits of Detection for Single- and Pooled crRNA Cas Reactions (Related to Figure 6)**

| Enzyme              | <i>Trans</i> -substrate | Target                  | Number of crRNA | crRNA                             | LOD (fM) <sup>b</sup> | k <sub>app</sub> (s <sup>-1</sup> ) <sup>c</sup> | Figure |
|---------------------|-------------------------|-------------------------|-----------------|-----------------------------------|-----------------------|--------------------------------------------------|--------|
| Cas13a <sup>a</sup> | 100 nM U <sub>10</sub>  | 1                       | 1               | Mature crRNA-1                    | 156 (± 10)            | 1.69 (± 0.01)                                    | 3B     |
|                     |                         |                         | 1               | Precursor crRNA-1                 | 18 (± 5)              | 15.8 (± 0.1)                                     |        |
|                     | 100 nM U <sub>20</sub>  | Pool of 13 <sup>a</sup> | 1               | Precursor crRNA-3                 | 160 (± 50)            | 3.47 (± 0.06)                                    | 6B     |
|                     |                         |                         | 13              | Precursor crRNA pool <sup>d</sup> | 29 (± 3)              | 31.7 (± 0.4)                                     |        |
|                     | 100 nM RNaseAlert       | Pool of 13 <sup>a</sup> | 1               | Precursor crRNA-3                 | 100 (± 60)            | NC <sup>e</sup>                                  |        |
|                     |                         |                         | 13              | Precursor crRNA pool <sup>d</sup> | 15 (± 3)              |                                                  |        |
| Cas12a <sup>b</sup> | 10 nM C <sub>10</sub>   | 1                       | 1               | Mature crRNA-1                    | 56 (± 6)              | 0.64 (± 0.02)                                    | 5C     |
|                     |                         | IS2404                  | 20              | Mature crRNA pool <sup>f</sup>    | 0.31 (± 0.08)         | 14.4 (± 0.2)                                     | 6G     |

<sup>a</sup> Pool of 13 equimolar target RNA specified by each crRNA in pool.

<sup>b</sup> Calculated based on total target concentrations as described in Methods.

<sup>c</sup> Calculated from slope of dependence of product on target concentration, accounting for assay time.

<sup>d</sup> Pool of 13 equimolar crRNA-3 to -5, 1-2, 2-2, -6 to -10, 11-2, 12-2, and 13.

<sup>e</sup> NC = not calculated.

<sup>f</sup> Pool of 20 equimolar crRNA-1 to -3, -5, and -7 to -22.
